# Supplementary material for: Motor control exercise for symptomatic lumbar disc herniation: protocol for a systematic review and meta-analysis
Source: PubMed Central journal article supplement — BMJ Open. 2016 Sep 27;6(9):e012426. doi: 10.1136/bmjopen-2016-012426 (PMC5051468; doi:10.1136/bmjopen-2016-012426), 2016-09-27
Supplement: bmjopen-2016-012426supp_appendix1.pdf [file bmjopen-2016-012426supp_appendix1.pdf]

## APPENDIX 1:

### PubMed database search syntax:

((Radicul\*[tiab] OR (Nerve Root\*[tiab] AND Disorder\*[tiab]) OR (Nerve Root\*[tiab] AND Inflammation\*[tiab]) OR (Nerve Root\*[tiab] AND Avulsion\*[tiab]) OR (Nerve Root\*[tiab] AND Compression\*[tiab]) OR (Degenerat\*[tiab] AND Intervertebral Disc\*[tiab]) OR (Disc\* Degenerat\*[tiab] AND Intervertebral[tiab]) OR (Degenerat\*[tiab] AND Intervertebral Disk\*[tiab]) OR (Disk\* Degenerat\*[tiab] AND Intervertebral[tiab]) OR (Disk\*[tiab] AND Degenerat\*[tiab]) OR (Disk\*[tiab] AND Degenerat\*[tiab]) OR (Disc\*[tiab] AND Degenerat\*[tiab]) OR (Disc\*[tiab] AND Herniat\*[tiab]) OR (Disk\*[tiab] AND Herniat\*[tiab]) OR (Slipped[tiab] AND Disk\*[tiab]) OR (Slipped[tiab] AND Disc\*[tiab]) OR (Disc\*[tiab] AND Prolaps\*[tiab]) OR (Disk\*[tiab] AND Prolaps\*[tiab]) OR (Disk\*[tiab] AND Prolaps\*[tiab]) OR (Disc\*[tiab] AND Prolaps\*[tiab]) OR Sciatic\*[tiab] OR (Sciatic\*[tiab] AND Neuralg\*[tiab]) OR (Bilateral[tiab] AND Sciatic\*[tiab]) OR Spondylosis[tiab] OR (Lumb\*[tiab] AND Spondylosis[tiab]) OR (Spondylosis[tiab] AND Deforman\*[tiab]) OR (Disc\*[tiab] AND Interveteb\*[tiab]) OR (Disk\*[tiab] AND Interveteb\*[tiab]) OR Dissectom\*[tiab] OR Diskectom\*[tiab] OR Disciti\*[tiab] OR Diskiti\*[tiab] OR Spondylodiskit\*[tiab] OR Spondylodiscit\*[tiab] OR "Intervertebral Disc\* Displacement"[tiab] OR "Intervertebral Disk\* Displacement"[tiab]) AND ((Therap\*[tiab] AND Exercise[tiab]) OR (Core Stabili\*[tiab]) OR (Stabili\*[tiab]) OR "Specific Exercise"[tiab] OR "General Exercise"[tiab] OR "Traditional Exercise"[tiab] OR Conventional Exercise"[tiab] OR Physical Therap\*[tiab] OR "Physiotherap\*[tiab] OR "Motor Control Exercise"[tiab] OR "Conservative"[tiab] OR "Habilitat\*[tiab] OR "Rehab\*[tiab] OR "Manage\*[tiab] OR "Intervention\*[tiab] OR (Movement Techni\*[tiab] AND Exercise\*[tiab]) OR (Pilates-Based[tiab] AND Exercise\*[tiab]) OR (Pilates[tiab] AND Training\*[tiab]) OR (Pilates Based[tiab] AND Exercise\*[tiab]) OR "Surger\*[tiab] OR (Operative[tiab] AND Therap\*[tiab]) OR (Operative[tiab] AND Procedure\*[tiab]) OR (Invasive[tiab] OR Procedure\*[tiab]) OR (operation\*[tiab]) OR (Peroperative[tiab] AND Procedure\*[tiab]) OR (Perioperative[tiab] AND Procedure\*[tiab]) OR (Preoperative[tiab] AND Procedure\*[tiab]) OR (Intraoperative[tiab] AND Procedure\*[tiab]))) AND (randomized controlled trial[pt] OR controlled clinical trial[pt] OR randomized controlled trials[mh] OR random allocation[mh] OR double-blind method[mh] OR single-blind method[mh] OR clinical trial[pt] OR clinical trials[mh] OR ("clinical trial"[tw]) OR ((singl\*[tw] OR doubl\*[tw] OR trebl\*[tw] OR tripl\*[tw]) AND (mask\*[tw] OR blind\*[tw])) OR ("latin square"[tw]) OR placebos[mh] OR placebo\*[tw] OR random\*[tw] OR research design[mh:noexp] OR comparative study[mh] OR evaluation studies[mh] OR follow-up studies[mh] OR prospective studies[mh] OR cross-over studies[mh] OR control\*[tw] OR prospectiv\*[tw] OR volunteer\*[tw]) NOT (animal[mh] NOT human[mh]) AND 1990/01/01:2016/04/31[dp].
